# Supplementary material for: Use of Vanadium Complexes Bearing Naphthalene-Bridged Nitrogen-Sulfonate Ligands as Catalysts for Copolymerization of Ethylene and Propylene
Source: MDPI journal article supplement (doi:10.3390/polym9080325), 2017-07-31
Supplement: s1 [file s1]

## Supporting Information

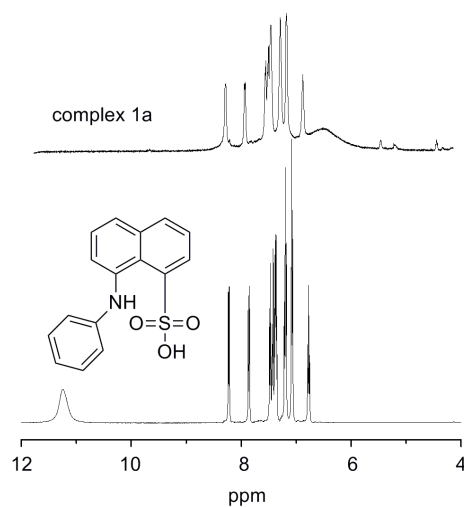

**Figure S1.**  $^1\text{H}$  NMR spectra of the ligand and complex **1a**.

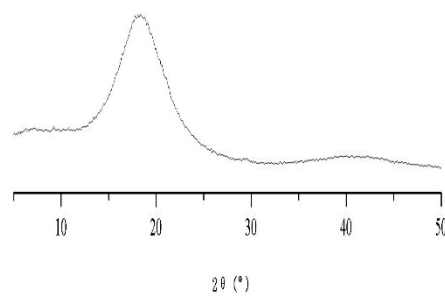

**Figure S2.** XRD spectrum of ethylene/propylene copolymer obtained with **1a**/EASC catalyst (sample from run 3 in Table 1).

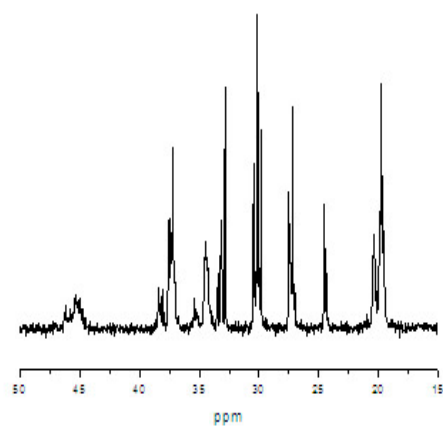

**Figure S3.**  $^{13}\text{C}$  NMR spectrum of ethylene/propylene copolymer obtained with **1b**/EASC catalyst (sample from run 6 in Table 1).

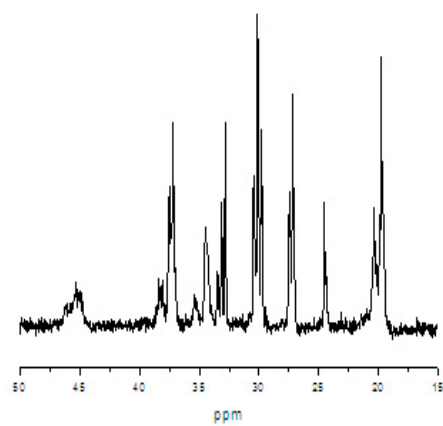

**Figure S4.**  $^{13}\text{C}$  NMR spectrum of ethylene/propylene copolymer obtained with  $\text{VOCl}_3$ /EASC catalyst (sample from run 10 in Table 1).
